# 1 **Aquatic biodiversity enhances multiple nutritional benefits to humans**

2 Joey R. Bernhardt<sup>1\*</sup>, Mary I. O'Connor<sup>1</sup>

3 <sup>1</sup>Department of Zoology and Biodiversity Research Centre, University of British Columbia,  
4 Vancouver, Canada, V6T 1Z4.

5 \*Correspondence to: [joey.bernhardt@biodiversity.ubc.ca](mailto:joey.bernhardt@biodiversity.ubc.ca).

6

7 **Funding:** Funding was provided by a Vanier Canada Graduate Scholarship to JRB.

8

9 **Author contributions:** JRB conceived the study, collected and curated the data. JRB analyzed  
10 and visualized the data with input from MIO. JRB wrote the original draft of the  
11 manuscript, JRB and MIO contributed to writing and editing. MIO supervised the study.

12

13 **Competing interests:** We declare no competing interests.

14

15 **Data and materials availability:** All data and code will be archived at the Dryad digital  
16 repository.

17 **Main text:** 1778 words

18 **Number of references:** 45

19 **Number of figures:** 4

20

21 **Acknowledgments:** We thank P. Thompson, A. Gehman, W. Cheung, M. Ruckelshaus and C.  
22 Harley and M. Deith for helpful comments on previous versions of this manuscript.

23

24

25 **Abstract**

26 Global food security relies on protein and essential micronutrients provided by seafood<sup>1-3</sup>. The  
27 importance of seafood-derived micronutrients to human health suggests that consuming diverse  
28 aquatic species could enhance human well-being<sup>4</sup>. Though biodiversity provides important  
29 benefits to humanity<sup>5</sup>, it is unclear how changes in species diversity could affect the human  
30 health benefits provided by aquatic ecosystems. A key scientific question remains unanswered -  
31 does increasing species diversity in seafood diets improve their ability to meet nutritional needs?  
32 Here we found that increasing species diversity allows seafood diets to fulfill multiple nutritional  
33 requirements simultaneously, a condition necessary for human health. Aquatic species with  
34 different ecological traits have distinct and complementary micronutrient profiles. The same  
35 complementarity mechanisms that generate positive biodiversity effects on ecosystem  
36 functioning in terrestrial ecosystems also operate in seafood assemblages, allowing for more  
37 diverse diets to yield increased nutritional benefits. Notably, nutritional metrics that capture  
38 multiple micronutrients essential for human well-being depend more strongly on biodiversity  
39 than ecological measures of function such as productivity. In contrast to the micronutrients, we  
40 found that increasing species diversity did not increase the amount of protein in seafood diets.  
41 We provide the first direct link between multiple nutritional benefits of biodiversity and an  
42 ecosystem service underpinning human wellbeing, thereby unifying biodiversity ecosystem  
43 functioning theory and human health. Our findings demonstrate that minimizing biodiversity loss  
44 at local and global scales will benefit global food and nutrition security.

45

## 46 **Introduction**

47 Biodiversity enhances ecosystem functions and services because species differ in functional  
48 traits or attributes<sup>6-8</sup>. Species losses and range shifts due to climate change, harvesting and other  
49 human activities alter aquatic biodiversity locally and globally<sup>9</sup>, with consequences for  
50 ecosystem functions<sup>6,10</sup>. Wild-caught marine and freshwater finfish and invertebrates (hereafter  
51 ‘seafood’) are rich and unique sources of essential micronutrients, such as vitamins, minerals and  
52 fatty acids not found in other foods. Human nutritional benefits from seafood are an important  
53 ecosystem service provided by aquatic biodiversity. If aquatic species differ in nutritional  
54 profiles as defined by human nutritional needs, the importance of biodiversity for food security  
55 depends on exactly how species’ multi-nutrient profiles vary. Specifically, a ‘biodiversity effect’  
56 of nutritional benefits requires that some seafood species contain high concentrations of some  
57 micronutrients while other species contain high concentrations of different micronutrients,  
58 creating a complementary distribution of micronutrients across species. Ecosystem services that  
59 reflect multiple ecosystem functions are believed to be most vulnerable to negative consequences  
60 of biodiversity loss<sup>11,12</sup>.

61  
62 We tested the hypothesis that aquatic biodiversity confers nutritional benefits through  
63 complementarity in nutrient concentrations among species. We tested whether 1) biodiversity of  
64 seafood supply enhances nutritional diversity ( $N_D$ ) in seafood diets and 2) biodiversity increases  
65 the nutritional content of an edible portion of seafood, thereby improving the efficiency ( $N_E$ )  
66 with which seafood consumers reach nutritional targets (Fig 1). We predicted that increased  
67 species richness in seafood diets yields increased nutritional benefits, and that variation in  
68 nutrient concentrations among species is related to species’ ecological traits. In a global analysis,

69 we considered provision of nutritional benefits to human consumers accessing worldwide  
70 seafood markets. We then tested whether seafood biodiversity promotes human health at local  
71 scales by providing multiple essential nutrients in fourteen traditional indigenous diets in North  
72 America. We quantified variation in nutrient concentrations in edible tissues of 430 commonly  
73 consumed aquatic species in the global species pool, and 25 – 57 species in fourteen local dietary  
74 species pools. This represents the first extension of biodiversity - ecosystem functioning (BEF)  
75 theory to a multivariate ecosystem service that is defined from the perspective of the human  
76 beneficiary and is directly relevant to human health.

77

## 78 **Results and Discussion**

79 We found that seafood biodiversity not only enhances nutritional benefits for consumers  
80 selecting seafood from species included in our global dataset, but it is essential to meeting  
81 nutritional targets. Species in the global dataset differed substantially in micronutrient  
82 concentrations, but not protein concentrations, relative to dietary reference intake (DRI) targets  
83 (Fig 2;  $\ln(\text{protein})$  geometric coefficient of variation (geometric CV) = 0.03 vs. micronutrient  
84 geometric CVs:  $\ln(\text{iron}) = 3.97$ ,  $\ln(\text{calcium}) = 3.25$ ,  $\ln(\text{EPA}) = 2.52$ ,  $\ln(\text{zinc}) = 2.10$ ,  $\ln(\text{DHA}) =$   
85 1.70). When we considered each nutrient separately, we found that fewer than half the species  
86 reached an arbitrary single-nutrient threshold of 10% of the daily DRI target<sup>13</sup> for calcium, iron  
87 and the essential fatty acid EPA in a standard 100g portion of a single species (Table S1). As  
88 species richness of diets increased, 10% DRI for any micronutrient was achieved with less total  
89 seafood intake (Fig 3A,  $b_E < 0$  for every micronutrient: calcium -0.43 (95% CI -0.47, -0.40), iron  
90 -0.40 (95% CI -0.43, -0.36), zinc -0.21 (95% CI -0.21, -0.23), EPA -0.25 (95% CI -0.26, -0.24)  
91 and DHA -0.21 (95% CI -0.21, -0.20)), meaning that increasing species richness lead to

92 enhanced nutritional efficiency ( $N_E$ ). All species reached the protein DRI target, and there was  
93 no benefit of seafood diversity for protein (Fig 3A,  $b_E = 0.0092$  95% CI 0.0086, 0.010).

94

95 We then considered the effects of seafood species richness on the provisioning of multiple  
96 nutrients simultaneously. We treated each nutrient concentration relative to 10% DRI as one  
97 ecosystem function. Consistent with biodiversity-ecosystem functioning theory, we found that in  
98 the case of a multifunctional metric of an ecosystem service defined from the human perspective  
99 (i.e. multiple micronutrient targets reached simultaneously), biodiversity benefits for the  
100 multifunctional service are greater than for individual functions ( $b_E$  for all five micronutrients  
101 simultaneously = -0.49 (95% CI -0.50, -0.48) vs. single nutrients  $b_E$  range from -0.43 (95% CI -  
102 0.47, -0.40) for calcium to -0.21 for EPA (95% CI -0.21, -0.20)) that comprise the ecosystem  
103 service (Fig 3A). Increasing species diversity in a hypothetical diet from one to five species  
104 allows consumers to meet 10% of DRI for five essential microelements and fatty acids  
105 simultaneously more than twice as efficiently (i.e. a median of 485.83g of tissue required with  
106 one species vs. median of 216.96g of tissue required with five species) (Fig 3B, C). We also  
107 found positive effects of biodiversity on the number of distinct nutritional functions (10% of DRI  
108 reached) in a single 100g portion (Fig 3D): more diverse diets reached more nutritional targets  
109 (higher  $N_D$ ) per serving than diets comprising fewer species ( $b_D = 0.21$  (95% CI: 0.18-0.24) Fig  
110 3D).

111

112 Despite recent claims that multifunctionality is not enhanced by biodiversity<sup>14</sup>, here we show  
113 that when function thresholds are grounded *a priori* in multivariate metrics meaningful for  
114 human wellbeing such as DRI, diversity enhances multifunctionality. These findings are robust

115 to multiple DRI threshold levels (Fig S1), and the biodiversity effect is strongest at a threshold of  
116 approximately 28% of DRI (Fig S1). More generally, ecosystem service benefits, as defined in  
117 metrics of human wellbeing rather than the traits of the species pool under consideration,  
118 typically are produced by several underlying ecosystem functions<sup>15</sup>. The strong effects of  
119 diversity on multifunctional benefits observed here may also apply to relationships between  
120 diversity and other services e.g., desired filtration rates of pollutants in wetlands<sup>16</sup>, or desired  
121 pest consumption rates in agricultural systems<sup>17</sup>.

122  
123 Consistent with the positive biodiversity effects we observed when assuming consumers have  
124 access to global seafood markets, we also found benefits of seafood diversity locally. We  
125 analyzed the effects of biodiversity in fourteen traditional indigenous North American diets and  
126 found a consistent, positive effect of biodiversity on  $N_D$  and  $N_E$ , although the magnitude of the  
127 biodiversity effect was generally lower at the local scale than the global scale (Fig 3C-D, Fig S2,  
128 S5) (global  $b_D = 0.21$  (95% CI 0.18, 0.24) vs mean local  $b_D = 0.14 \pm 0.0083$  S.E. and global  $b_E =$   
129  $-0.50$  (95% CI  $-0.52, -0.47$ ) vs mean local  $b_E = -0.16 \pm 0.0091$  S.E.). This finding is consistent  
130 with lower nutritional functional diversity (mean local  $FD = 2.77 \pm 0.17$  S.E. vs. global  $FD =$   
131  $3.87 \pm 0.0096$  S.E.) and higher nutritional functional evenness in local diets (mean local  $FEve =$   
132  $0.76 \pm 0.01$  S.E. vs. global  $FEve = 0.71 \pm 0.0018$  S.E.) (Fig S2, S5), suggesting that functional  
133 consequences of changes to diversity in local seafood diets may be buffered by higher  
134 redundancy among species. Given increasing trends towards homogenization of the global food  
135 supply<sup>18</sup> including aquaculture<sup>19,20</sup>, this local-scale finding highlights the importance of local  
136 species diversity in the diets of vulnerable populations<sup>21</sup>.

137

138 Substantial variation in nutrient concentrations in edible portions among species can be  
139 explained partly by major ecological attributes and traits: taxonomic group, latitude, body size,  
140 diet breadth and feeding habits (Tables S2-S6). Finfish, crustaceans and molluscs differed  
141 significantly in their multi-nutrient profiles (PERMANOVA,  $F_{2,103} = 3.429$ ,  $p = 0.006$ ). Among  
142 finfish, concentrations of calcium, iron and zinc in edible tissue decreased with increasing body  
143 size (Fig 4, negative slopes,  $p < 0.01$ , Tables S2-S6). Variation in protein and fat was poorly  
144 explained by species' ecological traits (Marginal  $R^2 = 0.023$ ,  $0.09$ , for protein and fat). In  
145 addition to ecological traits, finfish species that are eaten whole, or whose edible portions include  
146 organs such as skin, liver or bones, have higher nutrient concentrations in the edible portion than  
147 those whose edible portions are restricted to muscle tissue ( $R^2 = 0.60$ ,  $F_{5,251} = 76.24$ ,  $p < 0.01$ ;  
148 Fig S3). Nutrient concentrations were typically weakly negatively correlated or uncorrelated with  
149 each other among species (Fig S4), allowing complementarity among species to increase  
150 nutritional benefits.

151  
152 Maintaining the diversity of global fisheries is important for ensuring food and nutrition security.  
153 A diverse seafood species pool feeds not only local communities but also seafood markets  
154 worldwide, and aquatic species contain micronutrients not found in other foods. Many of the  
155 most nutritionally vulnerable populations – those that are deficient in essential micronutrients  
156 during particularly sensitive stages of life (i.e. pregnancy, breastfeeding and childhood) may rely  
157 on local ecosystems to meet their nutritional demands<sup>3,22,23</sup>. These populations may have access  
158 to a limited amount of locally available fish tissue each day or to fish from a subset of habitat  
159 types, suggesting that for these populations nutritional efficiency may be particularly important.  
160 In tropical regions, fish diversity in coastal regions has plummeted in recent decades<sup>24</sup>

161 characterized by two-fold declines in body sizes of fish <sup>25,26</sup>. These regions are also regions of  
162 high nutritional vulnerability and reliance on locally harvested seafood <sup>27</sup>. However, as the  
163 seafood trade becomes increasingly global <sup>28,29</sup>, seafood-derived nutrition available to consumers  
164 participating in the global market may be related to globally harvested seafood biodiversity. As a  
165 result, changes to local biodiversity and resultant impacts on human nutrition may be buffered by  
166 access to global seafood markets. Together, our results suggest that in the context of global  
167 change, understanding and protecting the potential for nature to support diverse and productive  
168 aquatic ecosystems has direct and immediate benefits to humanity.



169 **References:**

- 170
- 171 1. Latham, M. C. *Human nutrition in the developing world*. (Food & Agriculture Org.,  
172 1997).
- 173 2. Selig, E. R. *et al.* Mapping global human dependence on marine ecosystems. *Conserv.*  
174 *Lett.* e12617 (2018). doi:10.1111/conl.12617
- 175 3. Golden, C. D. *et al.* Fall in fish catch threatens human health. *Nature* **534**, 317–320  
176 (2016).
- 177 4. Penafiel, D., Lachat, C., Espinel, R., Van Damme, P. & Kolsteren, P. A systematic review  
178 on the contributions of edible plant and animal biodiversity to human diets. *EcoHealth* **8**,  
179 381–399 (2011).
- 180 5. Cardinale, B. J. *et al.* Biodiversity loss and its impact on humanity. *Nature* **486**, 59–67  
181 (2012).
- 182 6. Isbell, F. *et al.* Linking the influence and dependence of people on biodiversity across  
183 scales. *Nature* **546**, 65–72 (2017).
- 184 7. Duffy, J. E., Godwin, C. M. & Cardinale, B. J. Biodiversity effects in the wild are  
185 common and as strong as key drivers of productivity. *Nature* **549**, 261–264 (2017).
- 186 8. Balvanera, P. *et al.* Linking Biodiversity and Ecosystem Services: Current Uncertainties  
187 and the Necessary Next Steps. *Bioscience* **64**, 49–57 (2014).
- 188 9. Elahi, R. *et al.* Recent trends in local-scale marine biodiversity reflect community  
189 structure and human impacts. *Curr. Biol.* **25**, 1938–1943 (2015).
- 190 10. O’connor, M. I. *et al.* A general biodiversity--function relationship is mediated by trophic  
191 level. *Oikos* **126**, 18–31 (2017).
- 192 11. Lefcheck, J. S. *et al.* Biodiversity enhances ecosystem multifunctionality across trophic  
193 levels and habitats. *Nat. Commun.* **6**, 6936 (2015).
- 194 12. Byrnes, J. E. K. *et al.* Investigating the relationship between biodiversity and ecosystem  
195 multifunctionality: Challenges and solutions. *Methods in Ecology and Evolution* **5**, 111–  
196 124 (2014).
- 197 13. IOM, I. of M. *Dietary Reference Intakes for Calcium and Vitamin D*. **130**, (2012).
- 198 14. Gamfeldt, L. & Roger, F. Revisiting the biodiversity--ecosystem multifunctionality  
199 relationship. *Nat. Ecol. Evol.* **1**, s41559--17 (2017).
- 200 15. Manning, P. *et al.* Redefining ecosystem multifunctionality. *Nat. Ecol. Evol.* **2**, 427–436  
201 (2018).
- 202 16. Boyer, T. & Polasky, S. Valuing urban wetlands: A review of non-market valuation  
203 studies. *Wetlands* **24**, 744–755 (2004).
- 204 17. Karp, D. S. *et al.* Forest bolsters bird abundance, pest control and coffee yield. *Ecol. Lett.*  
205 **16**, 1339–1347 (2013).
- 206 18. Khoury, C. K. *et al.* Increasing homogeneity in global food supplies and the implications  
207 for food security. *Proc. Natl. Acad. Sci. U. S. A.* **111**, 4001–6 (2014).
- 208 19. Bostock, J. *et al.* Aquaculture: global status and trends. *Philos. Trans. R. Soc. London B*  
209 *Biol. Sci.* **365**, 2897–2912 (2010).
- 210 20. Duarte, C. M. *et al.* Will the oceans help feed humanity? *Bioscience* **59**, 967–976 (2009).
- 211 21. Bogard, J. R. *et al.* Higher fish but lower micronutrient intakes: Temporal changes in fish  
212 consumption from capture fisheries and aquaculture in Bangladesh. *PLoS One* **12**, (2017).
- 213 22. Kawarazuka, N. & Béné, C. Linking small-scale fisheries and aquaculture to household  
214 nutritional security: an overview. *Food Secur.* **2**, 343–357 (2010).

- 215 23. Bogard, J. R. *et al.* Nutrient composition of important fish species in Bangladesh and  
216 potential contribution to recommended nutrient intakes. *J. Food Compos. Anal.* **42**, 120–  
217 133 (2015).
- 218 24. Jones, G. P., McCormick, M. I., Srinivasan, M. & Eagle, J. V. Coral decline threatens fish  
219 biodiversity in marine reserves. *Proc. Natl. Acad. Sci. U. S. A.* **101**, 8251–3 (2004).
- 220 25. Molinos, J. G. *et al.* Climate velocity and the future global redistribution of marine  
221 biodiversity. *Nat. Clim. Chang.* **6**, 83–88 (2016).
- 222 26. Cheung, W. W. L. *et al.* Shrinking of fishes exacerbates impacts of global ocean changes  
223 on marine ecosystems. *Nat. Clim. Chang.* **3**, 254–258 (2013).
- 224 27. Allison, E. H. *et al.* Vulnerability of national economies to the impacts of climate change  
225 on fisheries. *Fish Fish.* **10**, 173–196 (2009).
- 226 28. Gephart, J. A. & Pace, M. L. Structure and evolution of the global seafood trade network.  
227 *Environ. Res. Lett.* **10**, 125014 (2015).
- 228 29. Watson, R. A., Green, B. S., Tracey, S. R., Farmery, A. & Pitcher, T. J. Provenance of  
229 global seafood. *Fish Fish.* **17**, 585–595 (2016).
- 230 30. Food and Agriculture Organization of the United Nations. *FAO/INFOODS Global Food*  
231 *Composition Database for Fish and Shellfish Version 1.0- uFiSh1.0.* (2016).
- 232 31. Nowak, V., Persijn, D., Rittenschober, D. & Charrondiere, U. R. Review of food  
233 composition data for edible insects. *Food Chem.* **193**, 39–46 (2014).
- 234 32. Froese, R. and D. P. *Fishbase version (06/2017).* (2017).
- 235 33. Palomares, M. L. D. and D. P. *SeaLifeBase version (06/2017).* (2017).
- 236 34. Kuhnlein, H. V. & Humphries, M. M. Traditional Animal Foods of Indigenous Peoples of  
237 Northern North America. (2017). Available at: <http://traditionalanimalfoods.org/>.  
238 (Accessed: 22nd May 2018)
- 239 35. Elzhov, T. V., Mullen, K. M., Spiess, A.-N. & Bolker, B. minpack.lm: R interface to the  
240 Levenberg-Marquardt nonlinear least-squares algorithm found in MINPACK, plus  
241 support for bounds. (2013).
- 242 36. Baty, F. *et al.* A Toolbox for Nonlinear Regression in R : The Package nlstools. *J. Stat.*  
243 *Softw.* **66**, 1–21 (2015).
- 244 37. Petchey, O. L. & Gaston, K. J. Functional diversity (FD), species richness and community  
245 composition. *Ecol. Lett.* **5**, 402–411 (2002).
- 246 38. Villéger, S., Mason, N. W. H. & Mouillot, D. New multidimensional functional diversity  
247 indices for a multifaceted framework in functional ecology. *Ecology* **89**, 2290–2301  
248 (2008).
- 249 39. Oksanen, J. *et al.* Package ‘vegan’. *Community Ecol. Packag. version 2*, (2013).
- 250 40. Burnham, K. P. & Anderson, D. R. *Information and likelihood theory: a basis for model*  
251 *selection and inference. Model Selection and Multimodel Inference: A Practical*  
252 *Information-Theoretic Approach* (2002).
- 253 41. Food and Agriculture Organization/ International Network of Food Data Systems  
254 (INFOODS). *FAO / INFOODS Guidelines for Checking Food Composition Data prior to*  
255 *the publication of a User Table / Database - Version 1 . 0.* (2012).
- 256 42. Food and Agriculture Organization. *Capture production by principal species in 2013.*  
257 (2013).
- 258 43. Cashion, T., Le Manach, F., Zeller, D. & Pauly, D. Most fish destined for fishmeal  
259 production are food-grade fish. *Fish Fish.* **18**, 837–844 (2017).
- 260 44. Barton, K. MuMIn: Multi-model inference. R package version 1.9. 13. *Compr. R Arch.*

- 261            *Netw. (CRAN), Vienna, Austria* (2013).  
262    45.    R Core Team. R: A Language and Environment for Statistical Computing. (2017).  
263  
264

265 **Figures**

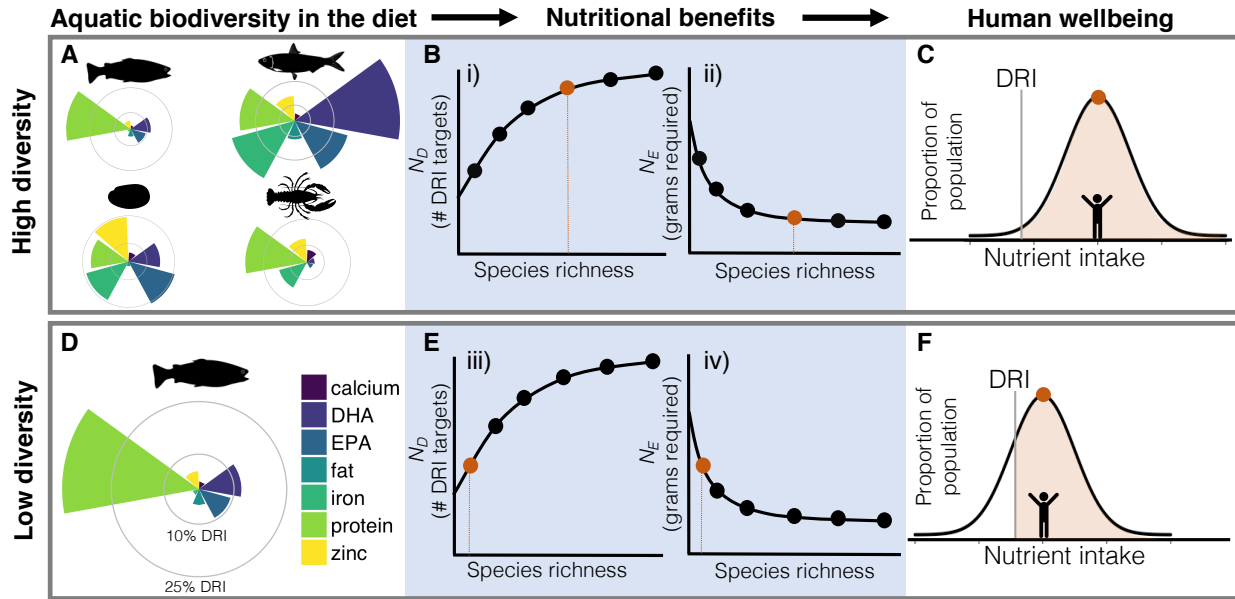

266

267 **Fig 1.** Aquatic biodiversity increases human well-being because edible species have distinct and  
 268 complementary multi-nutrient profiles (A) and differ in mean micro- and macronutrient content  
 269 (shown here relative to 10% and 25% thresholds of dietary reference intake (DRI) guidelines for  
 270 representative finfish (*Abramis brama*, *Mullus surmuletus*), mollusc (*Mytilus galloprovincialis*)  
 271 and crustacean species (*Nephrops norvegicus*). Biodiversity – ecosystem functioning theory  
 272 predicts that nutritional benefits, including nutritional diversity ( $N_D$ ; i, iii) and nutritional  
 273 efficiency ( $N_E$ ; ii, iv) (B, E), are enhanced with increasing dietary species richness. Seafood  
 274 consumers with limited access to seafood each day may not reach DRI targets if diets are low in  
 275 diversity (F vs C; orange shading indicates proportion of population that meets nutrient  
 276 requirements).

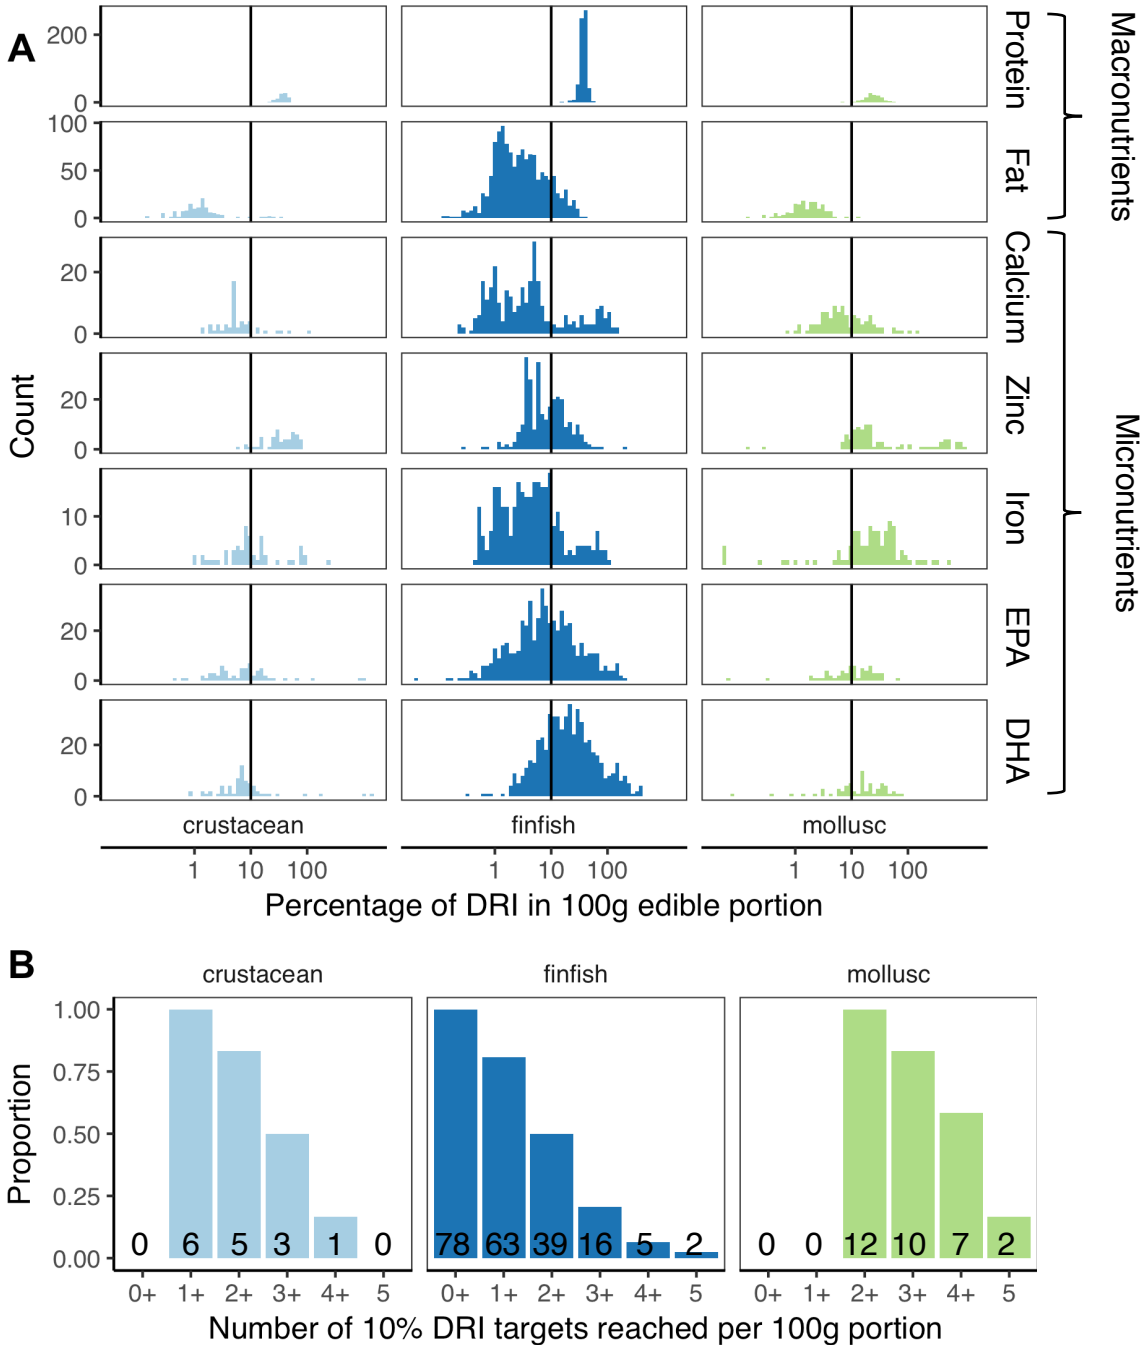

277

278 **Fig 2.** Variation in nutrient concentrations differs among taxonomic groups. (A) Frequency of  
 279 reported protein, fat and micronutrient (including eicosapentaenoic acid (EPA), docosahexaenoic  
 280 acid (DHA)) content in 100 g of the edible portion of 430 seafood species (references in Dataset  
 281 S1). (B) Proportion of species, and number shown on each bar, with available data that reach  
 282 10% of RDI targets for any one, two or up to five of the micronutrients examined here.

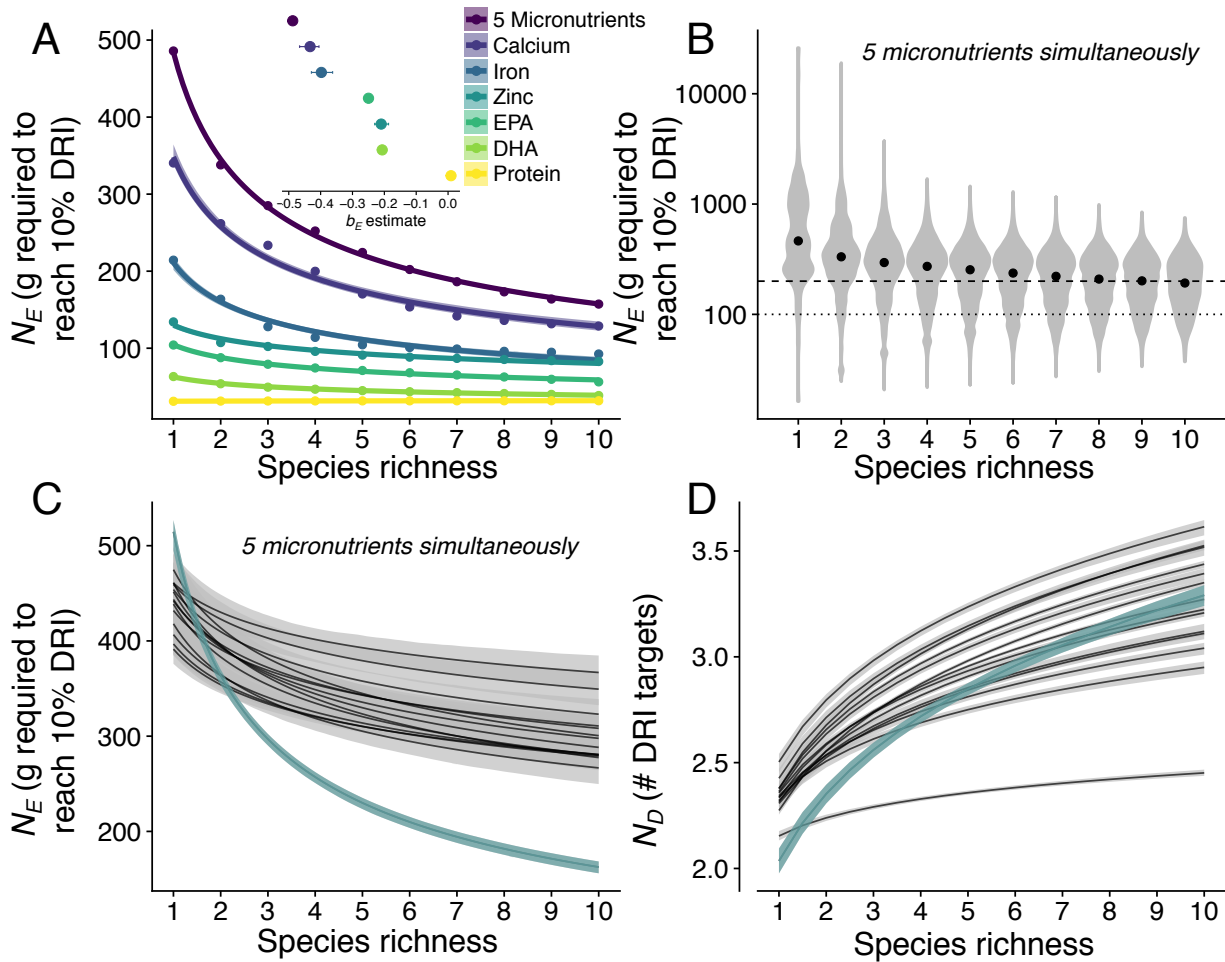

283

284 **Fig 3.** A) Seafood species richness improves the efficiency with which human diets can meet  
 285 10% of DRI by reducing the grams of seafood required to meet nutritional thresholds. Nutritional  
 286 efficiency ( $N_E$ ) is shown for five micronutrients and protein separately (points are median values  
 287 for calcium, iron, zinc, EPA, DHA and protein, lines show the fit of Equation 1 to the data and  
 288 shading refers to 95% CI) as well as for five micronutrients simultaneously (purple line labeled  
 289 ‘5 Micronutrients’); estimates for the  $b_E$  parameter ( $\pm$  standard error, inset) describe the strength  
 290 of the biodiversity effect. B) Increasing dietary species richness sourced from global seafood  
 291 markets increases the efficiency with which five micronutrient nutritional targets are reached;  
 292 solid circles are median values, as plotted in the purple line in A. C) Increasing species richness  
 293 increases the efficiency with which five micronutrient nutritional targets are reached at local and

294 global scales; shaded areas are 95% confidence intervals about the mean; black lines are the fit of  
295 Equation 1 for each of fourteen traditional diets in North America, green line is for a diet sourced  
296 from the global seafood market. D) Species richness increases the number of distinct DRI targets  
297 met in a 100g seafood portion (nutritional diversity,  $N_D$ ) in local and global seafood diets; lines  
298 are the fit of Equation 2, color coding as in C.  
299

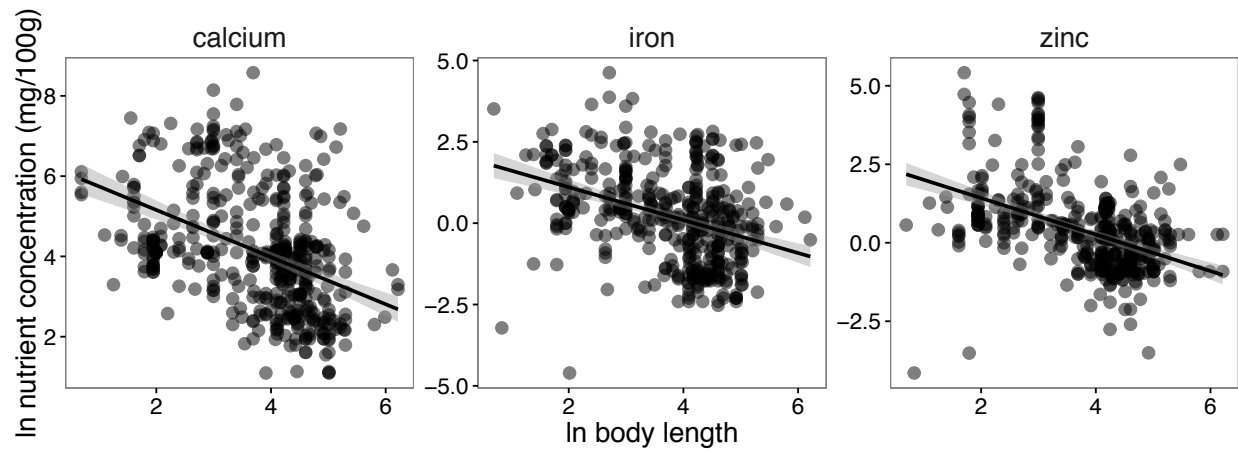

300

301 **Fig 4.** Micronutrient concentrations are significantly negatively related to body size (length, cm)

302 in finfish. Negative slopes: calcium: -0.26 (95% CI -0.38, -0.14,  $n = 174$ ), iron: -0.16 (95% CI -

303 0.30, -0.02,  $n = 181$ ), zinc: -0.16 (95% CI -0.30, -0.03,  $n = 161$ ).

304



305

306 **Supplementary Materials:**

307

308       Materials and Methods

309       Figs. S1 to S5

310       Tables S1 to S9

311

312 **Other Supplementary Materials for this manuscript includes the following:**

313

314       Database S1: Seafood nutrient data sources.

315

316

## 317 **Materials and Methods**

318

### 319 Quantifying nutritional value in terms of human health benefits

320

321 We characterized an aquatic species' nutritional profile by drawing on two well-established  
322 nutritional metrics: nutrient concentration (nutrient content/100g edible portion) and Dietary  
323 Reference Intake (DRI). DRIs are developed following health guidelines, and quantify the  
324 recommended amount of a particular nutrient required to maintain health<sup>13</sup>. The DRI used here  
325 is the Recommended Dietary Allowance, established by the Food and Nutrition Board of the  
326 United States Institute of Medicine, which is daily intake level of a nutrient needed to meet the  
327 requirements of 97–98% of healthy adults (males and females above age 19)<sup>13</sup>. We defined the  
328 nutritional value of a fish species for each nutrient in terms of the nutrient content in an edible  
329 portion relative to DRI. For some aquatic species, micronutrients are in such high concentrations  
330 in edible tissues that a single 100g portion contains the entire dietary reference intake (DRI) for  
331 that nutrient, while edible tissues from other species provide only small fractions of the DRI. We  
332 considered thresholds of nutritional benefit (function) between 1% and 100% of DRI, although  
333 we focus on 10% of DRI since it is a minimum threshold for a food to be considered of  
334 nutritional benefit<sup>13</sup>. We defined a nutritional function as providing  $\geq 10\%$  of DRI for a given  
335 nutrient. Using this definition, a particular species provides a nutritional function if it reaches  
336 10% or more of DRI for a given nutrient in a single 100g portion. For example, if a species  
337 provides 7% of DRI for zinc, 12% of DRI for iron, 30% of DRI for calcium, and 15% of DRI for  
338 each of EPA and DHA in a single 100g portion, then it provides four nutritional functions. We  
339 characterized nutritional profiles in two ways: first, in terms of concentrations of each nutrient  
340 (single nutrient profile), and secondly, in terms of multiple nutrients simultaneously (i.e. multi-  
341 nutrient profile).

342

343

### 344 Defining nutritional benefits

345

346 We quantified the effect of biodiversity on nutritional benefits in two ways (Fig 1): 1) *nutritional*  
347 *efficiency*,  $N_E$ , which quantifies that amount of tissue, in grams, required to reach a given number  
348 of nutritional functions (10% DRI targets) simultaneously and 2) *nutritional diversity*,  $N_D$ , which  
349 quantifies the number of distinct nutritional functions (10% DRI thresholds reached) in a  
350 standard 100g edible portion. Nutritional benefit increases with decreasing values of  $N_E$ , since  $N_E$   
351 quantifies the grams required to provide a nutritional function, and fewer grams required is better  
352 from the perspective of human nutrition. We quantified  $N_D$  in an arbitrary daily diet, assuming  
353 that the seafood diet contains 100g of seafood per day.

354

### 355 Literature search and data collection

356 We assembled a dataset of published nutrient concentrations in edible portions of 430 aquatic  
357 species. We analyzed tissue concentrations of nutrients for which DRI standards exist and that  
358 are implicated in a range of biologically important processes that affect organismal growth and  
359 reproduction, and therefore may potentially relate ecological function with human nutritional  
360 wellbeing. We examined macronutrients including protein and fat, as well as five micronutrients:  
361 the polyunsaturated fatty acids eicosapentaenoic acid (EPA) and docosahexaenoic acid (DHA),  
362 metals beneficial at low concentrations but toxic at high concentrations (zinc and iron), and one

363 beneficial mineral (calcium). We aimed to include as many marine and freshwater species as  
364 possible covering a wide geographic extent. We searched peer-reviewed literature for analytical  
365 food composition values as well as the Food and Agriculture Organization's Global Food  
366 Composition Database for Fish and Shellfish<sup>30</sup>. For finfish, we restricted our analysis to include  
367 only edible portions of wild, raw fish (excluding prepared or farmed seafood items). We included  
368 both farmed and wild mollusc species because mollusc farming does not typically involve  
369 additional food inputs, which could influence tissue nutrient composition. For each species, we  
370 noted which body parts are included in the edible portion and season of collection. For each  
371 sample, we noted the location of origin (e.g. latitude and longitude). To address inconsistencies  
372 in fatty acid data reporting, we standardized fatty acid measurements using the fatty acid  
373 conversion factors proposed by Nowak et al. 2014<sup>31</sup>. When there were multiple observations  
374 available for a single species, we averaged nutrient concentrations across the observations. We  
375 did not include data from national food composition tables because these data usually report  
376 seafood data with a generic food description, which does not allow for a clear description of  
377 which fish tissues are included in the edible portion. For each species with nutritional data, we  
378 collected ecological trait information from FishBase<sup>32</sup> and SeaLifeBase<sup>33</sup>. We included body  
379 size (maximum length), fractional trophic position, temperature preference (using latitude as a  
380 proxy), habitat preference, and feeding mode (Table S9).

381

382

### 383 Statistical analyses and hypothesis testing

384

#### 385 *Hypothesis 1: Biodiversity enhances nutritional benefits*

386 We tested the effect of species diversity (quantified as the number of species, or *species richness*,  
387 *S*) on nutritional diversity and efficiency by randomly assembling diets from the global seafood  
388 species pool. When estimating nutritional diversity, we kept the portion size constant (100  
389 grams) across all levels of diversity. In analyses using the global dataset (430 species), we  
390 assumed that human populations have access to the entire global species pool and choose species  
391 at random. Though this assumption certainly ignores economic, social and cultural factors that  
392 affect which species people consume, in the absence of detailed, species-specific diet  
393 information for the majority of the world's populations this is a necessary assumption. To assess  
394 potential effects of biodiversity on nutritional benefits for populations that consume seafood  
395 locally and not as part of the global seafood market, we analyzed traditional diets in fourteen  
396 indigenous cultures in North America. We used species lists for local diets that were obtained  
397 from an ethnographic database of traditional animal foods of indigenous peoples of northern  
398 North America, and only included species that were harvested wild and whose nutrient  
399 compositions were analyzed when raw (Table S7,<sup>34</sup>). To avoid confounding differences in  
400 biodiversity effects at global and local scales with the sizes of the species pools at each of these  
401 scales when comparing local and global biodiversity effects, we matched the size of the global  
402 species pool to the average size of the local species pools by first randomly subsampling 40  
403 species, the average size of the local species pools, from the global species pool.

404

405 We calculated two metrics of nutritional benefits for hypothetical diets comprising species drawn  
406 randomly from either the global dataset (global diet) or local datasets (local diets):

407

408 1) *Nutritional efficiency* ( $N_E$ ). We tested the hypothesis that complementarity in nutrient  
409 concentrations among species enhances  $N_E$  by estimating the effect of species richness,  $S$ , on  $N_E$   
410 (the ‘biodiversity effect’). To estimate the ‘biodiversity effect’ on  $N_E$ , we took an approach to  
411 modeling dietary species composition that is analogous to a biodiversity-ecosystem function  
412 experiment with a replacement design, where species abundances (i.e. portion size) decline  
413 proportionally as species richness increases. From the global species pool, we sampled ten  
414 species at random and then assembled seafood diets from all possible combinations of these ten  
415 randomly chosen species at 10 levels of species richness (1-10). We repeated this process of  
416 sampling ten species from the global species pool and then assembling all possible diets 1000  
417 times. For each combination of species in each dietary diversity level (1-10 species), we  
418 calculated the number of grams required to reach a given nutritional function (either: one of six  
419 possible 10% DRI targets individually, considering five micronutrients: calcium, iron, zinc, EPA  
420 and DHA and one macronutrient, protein, or all five micronutrient targets simultaneously). We  
421 quantified the effect of species richness in a diet on nutritional efficiency,  $N_E$ , by fitting a power  
422 function to these bootstrapped nutritional efficiency estimates:  
423

$$N_E = a_E S^{b_E} \quad (1)$$

424  
425 where the parameter  $b_E$  describes the relationship between a change in species richness,  $S$ , and a  
426 change in  $N_E$ , and  $a_E$  is a scaling factor (in grams) that determines the value of  $N_E$  when  $S = 1$ .  
427 Since  $N_E$  is measured in grams required to reach a given nutritional function (10% DRI target),  
428 and fewer grams required is better from the perspective of human nutrition, then a benefit of  
429 biodiversity would be reflected in a negative  $b_E$  (i.e.  $N_E$ , measured in grams of tissue required,  
430 decreases with species richness). For each nutrient individually, and for all five micronutrients  
431 together, we estimated the exponent parameter,  $b_E$ , using non-linear regression using the *nls.LM*  
432 function in the *minpack.lm* package in R<sup>35</sup>. To quantify uncertainty in parameter estimates  
433 associated with sampling from the pool of observed nutrient content values, we calculated  
434 bootstrapped confidence intervals using non-parametric bootstrapping of mean centered-  
435 residuals using the *nlsBoot* function in the R package *nlstools*<sup>36</sup>.  
436

437  
438 2) *Nutritional diversity* ( $N_D$ ). To test the hypothesis that complementarity in nutrient  
439 concentrations among species increases nutritional benefits by increasing the number of distinct  
440 nutritional functions (10% DRI targets) in a 100g portion, we constructed nutrient function  
441 accumulation curves. These are analogous to species accumulation curves used in ecological  
442 studies to assess patterns of beta-diversity, or species turnover, in ecological community  
443 composition data. We assessed turnover of nutrient content in edible tissues among seafood  
444 species. Each seafood species is associated with a set of 0s and 1s corresponding to whether or  
445 not it provides a nutritional function (achieves a threshold of 10% DRI) for each of five  
446 micronutrients (equivalent to a species presence-absence matrix in community composition  
447 data), sampled with replacement 1000 times. This approach allowed us to explore how likely it  
448 would be for human diets containing different numbers of seafood species to provide a given  
449 number of nutritional functions for micronutrients ( $N_D$  ranges between 0 and 5), assuming that  
450 species were included in the human diet at random. We quantified the effect of biodiversity on  
451 nutritional diversity,  $N_D$ , by fitting a power function,  
452

453 
$$N_D = a_D S^{b_D} \quad (2)$$

454  
455 where the parameter  $b_D$  describes the relationship between a change in species richness,  $S$ , and a  
456 change in  $N_D$  (i.e. the number of nutritional functions (distinct 10% DRI targets) reached per  
457 average 100g portion), and  $a_D$  is a scaling factor (in units of number of DRI targets) that  
458 determines the value of  $N_D$  when  $S = 1$ .

459  
460 For both  $N_E$  and  $N_D$ , we tested the hypothesis that biodiversity enhances nutritional benefits by  
461 assessing whether the estimate of the scaling exponent,  $b$ , had confidence intervals not  
462 overlapping zero. We concluded that biodiversity enhanced nutritional benefits if  $b_E$  was  
463 negative and  $b_D$  was positive.

464  
465 We hypothesized that nutritional functional diversity would be higher at the global scale than the  
466 local scale, because the global species pool contains more ecological and biogeographic  
467 diversity. To assess levels of nutritional functional diversity among species, we calculated  
468 functional diversity (FD)<sup>37</sup>. FD is based on an assessment of the entire functional diversity of a  
469 group represented as a functional dendrogram, and FD allows estimation of complementarity  
470 among species' nutrient concentrations (i.e. nutritional functional traits) using the dendrogram.  
471 We treated the concentration of each micronutrient (calcium, iron, zinc, EPA and DHA) as a  
472 functional trait. We also quantified a functional evenness metric ( $FEve$ ) using the  $FD$  package in  
473 R, which normally quantifies the evenness of abundance in a functional trait space. Here, we  
474 used  $FEve$  to quantify the evenness in concentration of nutrients across species<sup>38</sup>. To compare  
475  $FD$  and  $FEve$  at the global and local scales, we first subsampled 40 species (the average species  
476 pool at the local scale) from the global pool, then calculated the functional diversity metrics on  
477 the subsample, and repeated this process 1000 times. Using this same approach, we calculated  
478 levels of 'expected'  $FD$  and  $FEve$  for each local diet by choosing random subsets of the global  
479 pool with sample size equal to the species pool in each local diet, and repeated this process 1000  
480 times (Fig S5). The purposed of calculating 'expected'  $FD$  and  $FEve$  values is to test whether  
481 local diets are different from random subsets of the global species pool.

482  
483  
484 *Hypothesis 2: Diversity in nutrient concentrations of the edible portion is related to ecological*  
485 *diversity estimated as species' ecological traits.*

486  
487 We tested the hypothesis that nutrient concentrations are related to species' ecological traits in  
488 two ways: 1) testing whether multi-nutrient profiles (i.e. concentrations of all five  
489 micronutrients) differ among major phylogenetic groups and 2) whether differences in single  
490 nutrient concentrations differ with species ecological traits. We examined variation in multi-  
491 nutrient profiles among seafood species using the *vegan* package in R<sup>39</sup>. We ln transformed  
492 nutrient concentration data to achieve normality. We tested the hypothesis that major  
493 phylogenetic groups (i.e. finfish, mollusc, and crustacean) correlated with functional differences  
494 in life history, resource use and ecology differ in their multi-nutrient profiles via permutational  
495 multivariate ANOVA (PERMANOVA) using the *adonis* function (999 permutations) based on  
496 Bray-Curtis dissimilarity matrices. We used an overall (three-way) PERMANOVA to investigate  
497 phylogenetic group effects on nutrient profile of a species' edible tissue.

498

499 To test for associations between species' ecological functional traits and their nutrient  
500 concentrations, we modeled the relationship between traits and  $\ln(\text{nutrient concentration})$  with  
501 linear regression. The full model included the entire set of trait predictors as fixed effects and a  
502 random effect term for each study  $j$ ,  $\mu_j$ , capturing systematic variation among studies in terms of  
503 how nutrient concentrations were estimated:

$$\ln(\text{nutrient}) = \beta_0 + \beta_1 * \ln(\text{body size}) + \beta_2 * \text{latitude} + \beta_3 * \text{trophic position} + \beta_4 * \text{habitat} + \beta_5 * \text{feeding mode} + \beta_6 * \text{diet breadth} + \mu_j + \varepsilon_i$$

504  
505  
506  
507 We created models from subsets of the full model that represented hypotheses based on the  
508 known physiological roles of micronutrients and their relationships to our set of predictors  
509 (Tables S2-S6, S9). To avoid issues associated with multicollinearity of predictor variables, we  
510 excluded other possible variables if they were highly correlated (i.e. correlation coefficient >  
511 0.6). We identified the best subset of models using the Akaike Information Criterion, adjusted  
512 for small sample sizes (AICc). We used AICc,  $\partial\text{aic}$  and Akaike weights ( $w$ ) to compare models.  
513 We ranked models based on  $w$ , and selected the set of models that produced a cumulative  $w >$   
514 0.95, meaning that we are 95% confident that the chosen set includes the best model<sup>40</sup>. In cases  
515 where we could not obtain measurements of all traits for all species, we performed model  
516 selection on reduced datasets without missing values.  
517

#### 518 Uncertainties:

519  
520 There are several sources of uncertainty in our analyses. First, there are substantial sources of  
521 uncertainty in food composition estimates. The data in our dataset meet international standards  
522 for data quality and standardization, meaning that we followed guidelines for checking food  
523 composition data and converting units, denominators and expressions<sup>41</sup>). Still, tissue  
524 concentrations may vary depending on analytical techniques, labs, season, diet of the animal, life  
525 stage etc. Some of these sources of uncertainty (e.g. differences in analytical techniques) are  
526 unavoidable consequences of synthesizing previously published data collected across many labs.  
527 We assumed that these uncertainties in the data were randomly distributed over our  
528 geographically and taxonomically diverse dataset. Further uncertainty is associated with how  
529 well our set of 430 species represents the global pool of seafood consumed. We do not know  
530 whether our sample is random or biased, though we can say that our dataset includes 41 of the 67  
531 most consumed species worldwide (as determined by FAO production volumes<sup>42</sup>, species with  
532 capture production of 150 000 tonnes or more, after removing species for which the majority of  
533 production volume is diverted to fish meal and oil<sup>43</sup>, Table S8). A remaining source of variation  
534 among samples is likely due to natural sources of variation associated with seasonal and other  
535 sources of temporal variability, which we consider to be an important component of biodiversity.  
536 For the nutritional diversity and nutritional efficiency analyses, these uncertainties were not  
537 modeled. For the ecological trait analyses, the uncertainty in observation precision was modeled  
538 as normally distributed error term,  $\varepsilon_i$ , at the species level.  
539

540  
541 To account for model uncertainty in the ecological trait correlation analyses, we performed  
542 model averaging of coefficients in all models with  $\partial\text{aic} < 2$  ( $\partial\text{aic} = \text{AIC}_i - \text{AIC}_{\min}$ ), and included  
543 zeros as coefficients when variables did not enter a given model<sup>40</sup>. We conducted our model

544 selection and averaging analyses with the *MuMIn* package<sup>44</sup> and all other analyses in R version  
545 3.3.2<sup>45</sup>.



546 **Supplemental figures and tables**  
547

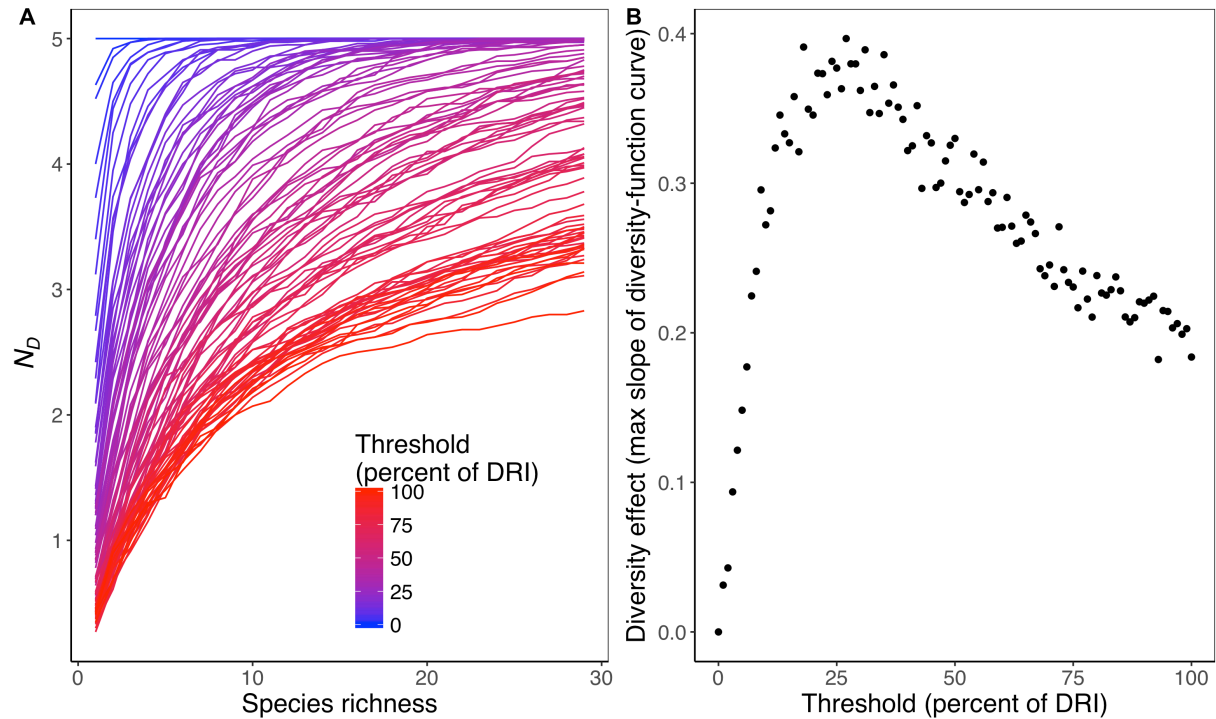

548  
549 **Fig S1.** The effect of biodiversity on nutritional diversity ( $N_D$ ) depends on the DRI threshold. A)  
550 Number of nutritional functions (distinct DRI targets), estimated as  $N_D$ , provided per 100g edible  
551 portion increases with species richness. B) The effect of biodiversity on nutritional diversity ( $N_D$ )  
552 is strongest at a threshold of approximately 28% of DRI.  
553



554  
555

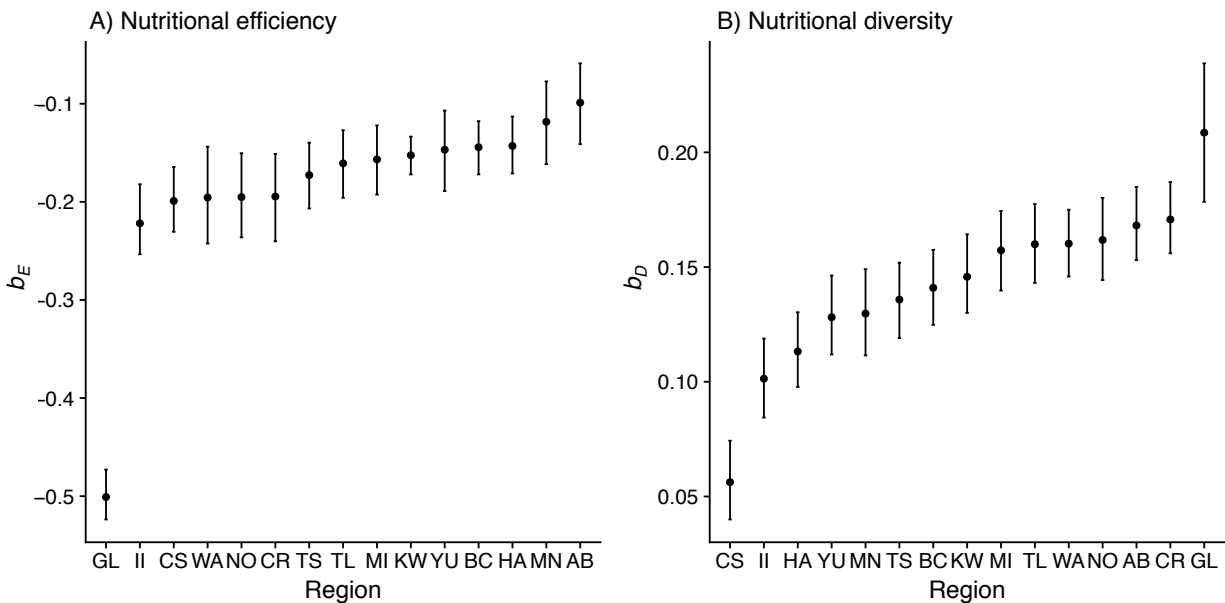

556  
557

558 **Fig S2.** Biodiversity enhances nutritional benefits in terms of two metrics of nutritional benefit:  
559 nutritional efficiency ( $N_E$ ) (A) and nutritional diversity ( $N_D$ ) (B). Each point corresponds to the  $b$   
560 parameter estimate from  $y = aS^b$ , where  $y$  = nutritional benefit ( $N_E$  or  $N_D$ ) and each point  
561 corresponds to one of fourteen local indigenous diets and the global diet (GL; standardized to 40  
562 species). Points are means  $\pm$  95% CI from non-parametric bootstrapping of the fit of Equations 1  
563 (panel A) and 2 (panel B) to randomly assembled diets. Names of regions for each local diet are  
564 represented in two-letter abbreviations which are listed in Table S7.  
565

566

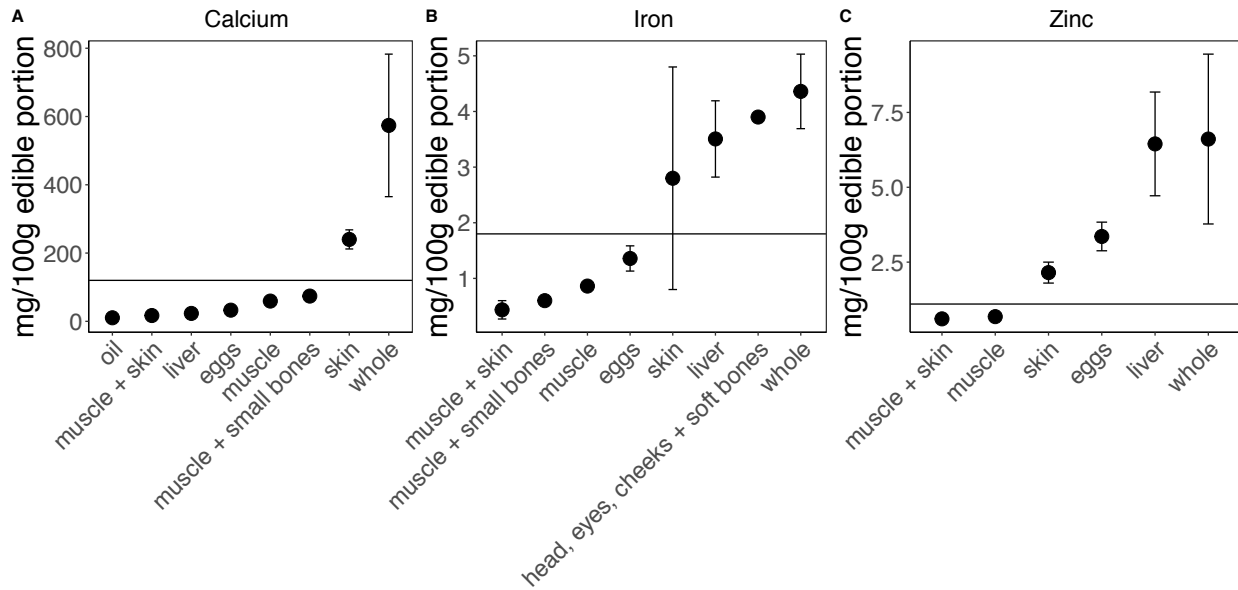

567

568 **Fig S3.** Nutrient variation associated with human dietary practices. Among finfish species,  
569 nutrient concentration varies by body part in the edible portion. Fish species that are eaten whole,  
570 or whose edible portions include organs such as skin, liver or bones have higher nutrient  
571 concentrations than those whose edible portions are restricted to muscle tissue. Points are means  
572  $\pm$  standard error.

573

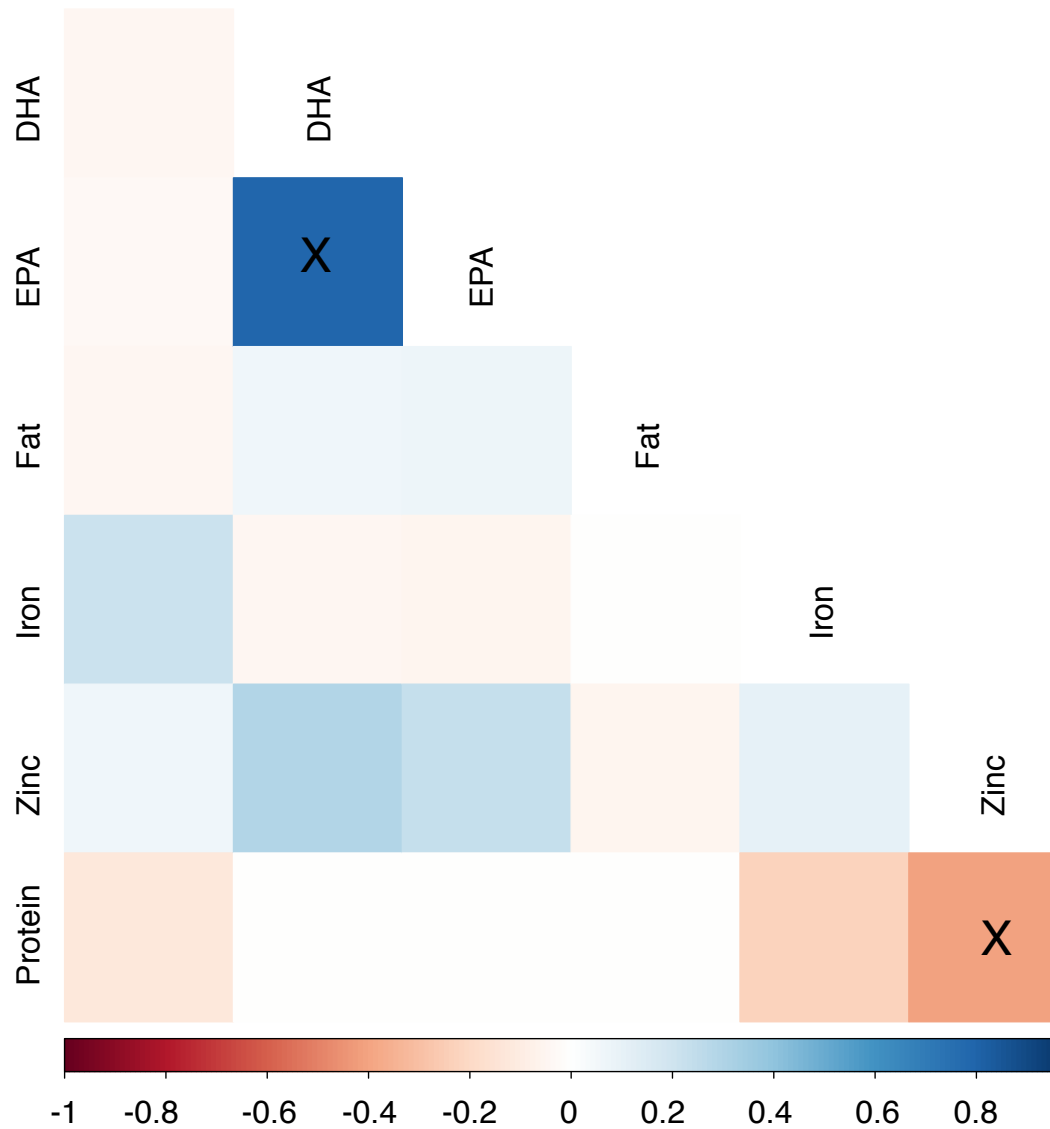

574

575

576 **Fig S4.** Correlations among nutrient concentrations among species. Nutrient concentrations are  
577 typically weakly correlated or uncorrelated among species. Shading corresponds to correlation  
578 coefficients, squares covered with an 'X' are significantly correlated;  $p < 0.05$ .

579

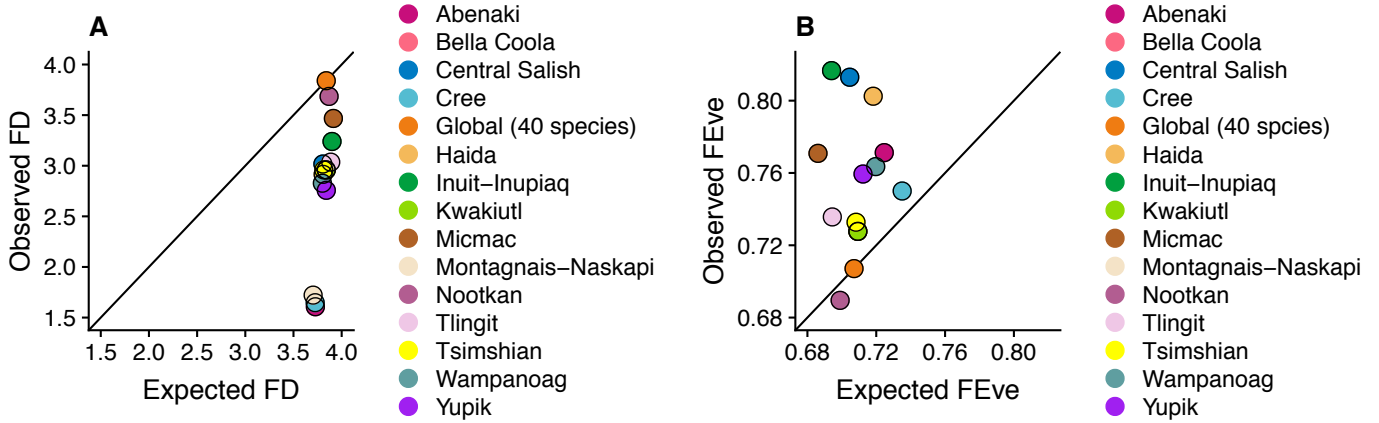

580  
581  
582  
583

**Fig S5.** Observed vs Expected functional diversity (*FD*) and functional evenness (*FEve*) in local and global diets.

584

| Nutrient | Crustacean | Crustacean n | Finfish | Finfish n | Mollusc | Mollusc n | All species | All species n |
|----------|------------|--------------|---------|-----------|---------|-----------|-------------|---------------|
| Calcium  | 25         | 20           | 31.03   | 174       | 35.29   | 34        | 31.14       | 228           |
| DHA      | 30         | 30           | 72.47   | 287       | 62.5    | 24        | 68.04       | 341           |
| EPA      | 34.38      | 32           | 43.75   | 288       | 70.83   | 24        | 44.77       | 344           |
| Fat      | 4          | 50           | 11.59   | 509       | 0       | 53        | 9.97        | 612           |
| Iron     | 50         | 22           | 18.78   | 181       | 91.89   | 37        | 32.92       | 240           |
| Protein  | 100        | 34           | 100     | 351       | 100     | 45        | 100         | 430           |
| Zinc     | 94.12      | 17           | 44.72   | 161       | 88.24   | 34        | 55.66       | 212           |

585

586

587

588

**Table S1.** Percentage of species that reach 10% of DRI, and total number of species (n) grouped by taxonomic group.

589

| Iron Trait                   | Model rank |      |      |        |        |         | Model average |                  |
|------------------------------|------------|------|------|--------|--------|---------|---------------|------------------|
|                              | 1          | 2    | 3    | 4      | 5      | 6       | $\beta$       | 95% CI           |
| ln(body size)                | •          |      | •    |        | •      | •       | 0.099         | -0.11 to 0.30    |
| Trophic position             | •          | •    | •    | •      | •      |         | <b>-0.46</b>  | -0.74 to -0.20   |
| Herbivore grazer             | •          |      |      | •      | •      | •       | -0.051        | -1.03 to 0.91    |
| Omnivore                     | •          |      |      | •      | •      | •       | -0.27         | -0.69 to 0.14    |
| Latitude                     | •          | •    | •    | •      |        | •       | -0.022        | -0.041 to -0.034 |
| Feeding mode grazer          |            | •    | •    | •      |        | •       | 0.039         | -0.70 to 0.77    |
| Feeding mode active predator |            | •    | •    | •      |        | •       | 0.26          | -0.75 to 1.27    |
| Feeding mode filter feeder   |            | •    | •    | •      |        | •       | 0.57          | -0.49 to 1.63    |
| Feeding mode variable        |            | •    | •    | •      |        | •       | -0.13         | -1.24 to 0.98    |
| Marginal $R^2$               | 0.12       | 0.12 | 0.12 | 0.12   | 0.039  | 0.12    |               |                  |
| Conditional $R^2$            | 0.80       | 0.79 | 0.79 | 0.79   | 0.80   | 0.77    |               |                  |
| $\delta\text{aic}$           | 0.00       | 0.14 | 1.79 | 2.77   | 2.93   | 14.20   |               |                  |
| $w$                          | 0.35       | 0.33 | 0.14 | 0.0089 | 0.0081 | 0.00029 |               |                  |

590

591 **Table S2.** Results of model averaging and model selection for iron. The variables included in  
592 each model are shown with the symbol •. Models are ranked in order of increasing  $\delta\text{aic}$ . Akaike  
593 weights ( $w$ ) indicate the relative likelihood of a model, given the particular set of best models  
594 being considered<sup>40</sup>. Model-averaged regression coefficients ( $\beta$ ) are averages of  $\beta$  across all  
595 models with  $\delta\text{aic} < 2$ , weighted by each model's Akaike weight  $w$ . Calculations for  $\beta$  include  $\beta =$   
596 0 when variables are not in a given model.  $\beta$  whose 95% confidence intervals do not encompass  
597 zero are given in bold.  
598

| Calcium<br>Trait             | Model rank |      |       |        |        |         | Model average |                  |
|------------------------------|------------|------|-------|--------|--------|---------|---------------|------------------|
|                              | 1          | 2    | 3     | 4      | 5      | 6       | $\beta$       | 95% CI           |
| ln(body size)                | •          | •    | •     |        |        |         | <b>-0.37</b>  | -0.63 to -0.12   |
| Trophic position             | •          | •    |       | •      | •      | •       | -0.17         | -0.49 to 0.16    |
| Herbivore grazer             | •          |      | •     |        | •      | •       | -0.21         | -1.11 to 0.28    |
| Omnivore                     | •          |      | •     |        | •      | •       | -0.18         | -0.83 to 0.42    |
| Latitude                     | •          | •    | •     | •      | •      |         | <b>-0.040</b> | -0.058 to -0.022 |
| Feeding mode grazer          | •          | •    | •     |        |        | •       | -0.063        | -0.80 to 0.92    |
| Feeding mode active predator | •          | •    | •     |        |        | •       | 0.33          | -0.54 to 1.20    |
| Feeding mode filter feeder   | •          | •    | •     |        |        | •       | -0.049        | -1.02 to 0.92    |
| Feeding mode variable        | •          | •    | •     |        |        | •       | 0.088         | -0.96 to 1.14    |
| Marginal $R^2$               | 0.30       | 0.29 | 0.29  | 0.26   | 0.26   | 0.032   |               |                  |
| Conditional $R^2$            | 0.74       | 0.74 | 0.75  | 0.74   | 0.74   | 0.78    |               |                  |
| $\delta\text{aic}$           | 0.00       | 2.23 | 5.32  | 8.83   | 11.07  | 13.20   |               |                  |
| $w$                          | 0.71       | 0.23 | 0.050 | 0.0086 | 0.0028 | 0.00096 |               |                  |

599

600 **Table S3.** Results of model averaging and model selection for calcium. The variables included in  
601 each model are shown with the symbol •. Models are ranked in order of increasing  $\delta\text{aic}$ . Akaike  
602 weights ( $w$ ) indicate the relative likelihood of a model, given the particular set of best models  
603 being considered<sup>40</sup>. Model-averaged regression coefficients ( $\beta$ ) are averages of  $\beta$  across all  
604 models with  $\delta\text{aic} < 2$ , weighted by each model's Akaike weight  $w$ . Calculations for  $\beta$  include  $\beta =$   
605 0 when variables are not in a given model.  $\beta$  whose 95% confidence intervals do not encompass  
606 zero are given in bold.

607

608

| Zinc Trait                   | Model rank |       |       |       |       |       | Model average |                   |
|------------------------------|------------|-------|-------|-------|-------|-------|---------------|-------------------|
|                              | 1          | 2     | 3     | 4     | 5     | 6     | $\beta$       | 95% CI            |
| ln(body size)                |            | •     | •     | •     |       | •     | -0.091        | -0.28 to 0.097    |
| Trophic position             | •          | •     | •     |       | •     |       | -0.16         | -0.39 to 0.067    |
| Herbivore grazer             |            | •     |       | •     | •     | •     | -0.22         | -0.95 to 0.52     |
| Omnivore                     |            | •     |       | •     | •     | •     | 0.057         | -0.32 to 0.44     |
| Latitude                     | •          | •     | •     | •     | •     |       | <b>-0.023</b> | -0.037 to -0.0074 |
| Feeding mode grazer          | •          |       |       | •     | •     |       | -0.30         | -1.02 to 0.41     |
| Feeding mode active predator | •          |       |       | •     | •     |       | -0.21         | -1.12 to 0.70     |
| Feeding mode filter feeder   | •          |       |       | •     | •     |       | 0.12          | -0.82 to 1.07     |
| Feeding mode variable        | •          |       |       | •     | •     |       | -0.43         | -1.43 to 0.58     |
| Marginal $R^2$               | 0.15       | 0.14  | 0.16  | 0.17  | 0.16  | 0.014 |               |                   |
| Conditional $R^2$            | 0.70       | 0.72  | 0.79  | 0.68  | 0.69  | 0.74  |               |                   |
| $\delta aic$                 | 0.00       | 0.62  | 0.19  | 2.63  | 3.35  | 5.20  |               |                   |
| $w$                          | 0.355      | 0.261 | 0.196 | 0.095 | 0.067 | 0.026 |               |                   |

609  
610  
611  
612  
613  
614  
615  
616  
617

**Table S4.** Results of model averaging and model selection for zinc. The variables included in each model are shown with the symbol •. Models are ranked in order of increasing  $\delta aic$ . Akaike weights ( $w$ ) indicate the relative likelihood of a model, given the particular set of best models being considered<sup>40</sup>. Model-averaged regression coefficients ( $\beta$ ) are averages of  $\beta$  across all models with  $\delta aic < 2$ , weighted by each model's Akaike weight  $w$ . Calculations for  $\beta$  include  $\beta = 0$  when variables are not in a given model.  $\beta$  whose 95% confidence intervals do not encompass zero are given in bold.



| EPA                | Model rank |       |       |       |       |       | Model average |                  |
|--------------------|------------|-------|-------|-------|-------|-------|---------------|------------------|
|                    | 1          | 2     | 3     | 4     | 5     | 6     | $\beta$       | 95% CI           |
| Trait              |            |       |       |       |       |       |               |                  |
| ln(body size)      | •          | •     | •     | •     | •     |       | <b>-0.21</b>  | -0.40 to -0.015  |
| Trophic position   | •          | •     | •     | •     |       | •     | -0.26         | -0.57 to 0.057   |
| Herbivore grazer   | •          | •     |       |       | •     | •     | -0.069        | -0.59 to 0.45    |
| Omnivore           | •          | •     |       |       | •     | •     | -0.23         | -0.72 to 0.26    |
| Latitude           |            | •     | •     | •     | •     | •     | 0.0093        | -0.0085 to 0.027 |
| Marginal $R^2$     | 0.015      | 0.020 | 0.022 | 0.020 | 0.021 | 0.022 |               |                  |
| Conditional $R^2$  | 0.82       | 0.82  | 0.82  | 0.82  | 0.82  | 0.82  |               |                  |
| $\delta\text{aic}$ | 0.00       | 1.02  | 6.32  | 6.82  | 9.48  | 10.24 |               |                  |
| $w$                | 0.591      | 0.356 | 0.025 | 0.020 | 0.005 | 0.004 |               |                  |

618  
619  
620  
621  
622  
623  
624  
625  
626

**Table S5.** Results of model averaging and model selection for EPA. The variables included in each model are shown with the symbol •. Models are ranked in order of increasing  $\delta\text{aic}$ . Akaike weights ( $w$ ) indicate the relative likelihood of a model, given the particular set of best models being considered<sup>40</sup>. Model-averaged regression coefficients ( $\beta$ ) are averages of  $\beta$  across all models with  $\delta\text{aic} < 2$ , weighted by each model's Akaike weight  $w$ . Calculations for  $\beta$  include  $\beta = 0$  when variables are not in a given model.  $\beta$  whose 95% confidence intervals do not encompass zero are given in bold.

| DHA<br>Trait                 | Model rank |       |       |       |       |       | Model average |                  |
|------------------------------|------------|-------|-------|-------|-------|-------|---------------|------------------|
|                              | 1          | 2     | 3     | 4     | 5     | 6     | $\beta$       | 95% CI           |
| ln(body size)                | •          | •     | •     | •     |       |       | <b>-0.21</b>  | -0.40 to -0.023  |
| Trophic position             | •          | •     |       | •     | •     | •     | 0.10          | -0.19 to 0.39    |
| Herbivore grazer             |            | •     | •     | •     | •     | •     | -0.27         | -0.85 to 0.31    |
| Omnivore                     |            | •     | •     | •     | •     | •     | -0.31         | -0.76 to 0.15    |
| Latitude                     |            |       | •     | •     | •     | •     | 0.0071        | -0.0090 to 0.023 |
| Feeding mode grazer          | •          |       | •     |       | •     | •     | 0.38          | -0.27 to 1.02    |
| Feeding mode active predator | •          |       | •     |       | •     | •     | 0.072         | -0.57 to 0.72    |
| Feeding mode filter feeder   | •          |       | •     |       | •     | •     | 0.70          | -0.21 to 1.61    |
| Feeding mode variable        | •          |       | •     |       | •     | •     | -0.18         | -0.86 to 0.51    |
| Marginal $R^2$               | 0.022      | 0.010 | 0.024 | 0.016 | 0.018 | 0.020 |               |                  |
| Conditional $R^2$            | 0.81       | 0.80  | 0.81  | 0.80  | 0.81  | 0.81  |               |                  |
| $\delta aic$                 | 0.00       | 0.45  | 1.62  | 1.82  | 2.26  | 5.35  |               |                  |
| $w$                          | 0.329      | 0.263 | 0.146 | 0.133 | 0.106 | 0.023 |               |                  |

627  
628  
629  
630  
631  
632  
633  
634  
635

**Table S6.** Results of model averaging and model selection for DHA. The variables included in each model are shown with the symbol •. Models are ranked in order of increasing  $\delta aic$ . Akaike weights ( $w$ ) indicate the relative likelihood of a model, given the particular set of best models being considered<sup>40</sup>. Model-averaged regression coefficients ( $\beta$ ) are averages of  $\beta$  across all models with  $\delta aic < 2$ , weighted by each model's Akaike weight  $w$ . Calculations for  $\beta$  include  $\beta = 0$  when variables are not in a given model.  $\beta$  whose 95% confidence intervals do not encompass zero are given in bold.

| Culture            | Abbreviation | Region          | Location                                                          | Species in diet |
|--------------------|--------------|-----------------|-------------------------------------------------------------------|-----------------|
| Abenaki            | AB           | Northeast       | Quebec; Maine                                                     | 29              |
| Bella Coola        | BC           | Northwest Coast | British Columbia                                                  | 40              |
| Central Salish     | CS           | Northwest Coast | British Columbia; Washington                                      | 42              |
| Cree               | CR           | Subarctic       | Labrador; Quebec; Ontario; Manitoba; Saskatchewan; Alberta        | 27              |
| Haida              | HA           | Northwest Coast | British Columbia; Alaska                                          | 36              |
| Inuit-Inupiaq      | II           | Arctic          | Alaska; Northwest Territories; Nunavut; Nunavik; Quebec; Labrador | 52              |
| Kwakiutl           | KW           | Northwest Coast | British Columbia                                                  | 40              |
| Micmac             | MI           | Northeast       | Nova Scotia; New Brunswick; Quebec; Newfoundland                  | 57              |
| Montagnais-Naskapi | MN           | Subarctic       | Labrador; Quebec                                                  | 25              |
| Nootkan            | NO           | Northwest Coast | British Columbia; Washington                                      | 49              |
| Tlingit            | TL           | Northwest Coast | British Columbia; Yukon; Alaska                                   | 51              |
| Tsimshian          | TS           | Northwest Coast | British Columbia; Alaska                                          | 41              |
| Wampanoag          | WA           | Northeast       | Massachusetts                                                     | 35              |
| Yupik              | YU           | Arctic          | Alaska                                                            | 38              |

636  
637  
638  
639

**Table S7.** Names and locations of North American indigenous cultures used in the local scale nutritional diversity analysis.

640  
641

| <b>Genus</b>         | <b>species</b>       |
|----------------------|----------------------|
| <i>Theragra</i>      | <i>chalcogramma</i>  |
| <i>Gadus</i>         | <i>morhua</i>        |
| <i>Gadus</i>         | <i>macrocephalus</i> |
| <i>Tenualosa</i>     | <i>ilisha</i>        |
| <i>Rastrelliger</i>  | <i>kanagurta</i>     |
| <i>Merluccius</i>    | <i>productus</i>     |
| <i>Oncorhynchus</i>  | <i>gorbuscha</i>     |
| <i>Pollachius</i>    | <i>virens</i>        |
| <i>Melanogrammus</i> | <i>aeglefinus</i>    |
| <i>Thunnus</i>       | <i>alalunga</i>      |
| <i>Oreochromis</i>   | <i>niloticus</i>     |
| <i>Penaeus</i>       | <i>monodon</i>       |
| <i>Portunus</i>      | <i>pelagicus</i>     |
| <i>Trachurus</i>     | <i>trachurus</i>     |

642  
643  
644  
645

**Table S8.** Top fourteen of 41 most commonly consumed species as per FAO production volumes in the nutrient dataset. Data source: <sup>42</sup>.

| Categorical predictors      | Levels                                    |       |       |
|-----------------------------|-------------------------------------------|-------|-------|
| <b>Feeding mode</b>         | browsing on substrate                     |       |       |
|                             | feeding on the prey of a host (commensal) |       |       |
|                             | filtering plankton                        |       |       |
|                             | grazing on aquatic plants                 |       |       |
|                             | hunting macrofauna (predator)             |       |       |
|                             | other                                     |       |       |
|                             | selective plankton feeding                |       |       |
|                             | sucking food-containing material          |       |       |
|                             | variable                                  |       |       |
|                             |                                           |       |       |
| <b>Diet breadth</b>         | mainly animals                            |       |       |
|                             | mainly plants/detritus                    |       |       |
|                             | plants/detritus+animals                   |       |       |
| Continuous predictors       | Min                                       | Mean  | Max   |
| ln(body size)               | 1.95                                      | 4.22  | 6.68  |
| absolute latitude           | 0.03                                      | 38.06 | 82.86 |
| fractional trophic position | 2                                         | 3.55  | 4.55  |

**Table S9.** Predictors used in linear mixed effects models.

646  
647  
648

649 **Dataset S1. (separate file)**

650 List of species and data sources for nutrient concentration in the global seafood nutrient dataset.
